# Supplementary material for: An azodye–rhodamine-based fluorescent and colorimetric probe specific for the detection of Pd2+ in aqueous ethanolic solution: synthesis, XRD characterization, computational studies and imaging in live cells
Source: Royal Society of Chemistry journal article supplement (doi:10.1039/c4an01575d), 2014-12-12
Supplement: c4an01575d1.pdf [file c4an01575d1.pdf]

**Electronic Supplementary Information(ESI)**

**for**

**Azodye–Rhodamine-Based Fluorescent and Colorimetric Probe Specific for the Detection of Pd<sup>2+</sup> in Aqueous Ethanolic Solution: Synthesis, XRD characterization, Computational Studies, and Imaging in Live Cells**

Ajit Kumar Mahapatra<sup>\*,a</sup>, Saikat Kumar Manna,<sup>a</sup> Kalipada Maiti,<sup>a</sup> Sanchita Mondal,<sup>a</sup> Rajkishor Maji,<sup>a</sup> Debasish Mandal,<sup>b</sup> Sukhendu Mandal,<sup>c</sup> Md. Raihan Uddin,<sup>c</sup> Shyamaprosad Goswami,<sup>a</sup> Ching Kheng Quah<sup>d</sup> and Hoong-Kun Fun<sup>d,e</sup>

<sup>a</sup>Department of Chemistry, Indian Institute of Engineering Science and Technology, Shibpur, Howrah – 711103, India.

<sup>b</sup>Institute of Chemistry, The Hebrew University of Jerusalem, 91904 Jerusalem, Israel

<sup>c</sup>Department of Microbiology, Ballygunge Science College, Kolkata- 700019

<sup>d</sup>X-ray Crystallography Unit, School of Physics, Universiti Sains Malaysia, 11800 USM, Penang, Malaysia.

<sup>e</sup> Department of Pharmaceutical Chemistry College of Pharmacy, King Saud University, P.O. Box. 2457, Riyadh 11451 Kingdom of Saudi Arabia.

\*Corresponding author: Tel.: +91 33 2668 4561; fax: +91 33 26684564;

E-mail: mahapatra574@gmail.com

1. <sup>1</sup>H NMR spectrum of L (400 MHz, CDCl<sub>3</sub>):

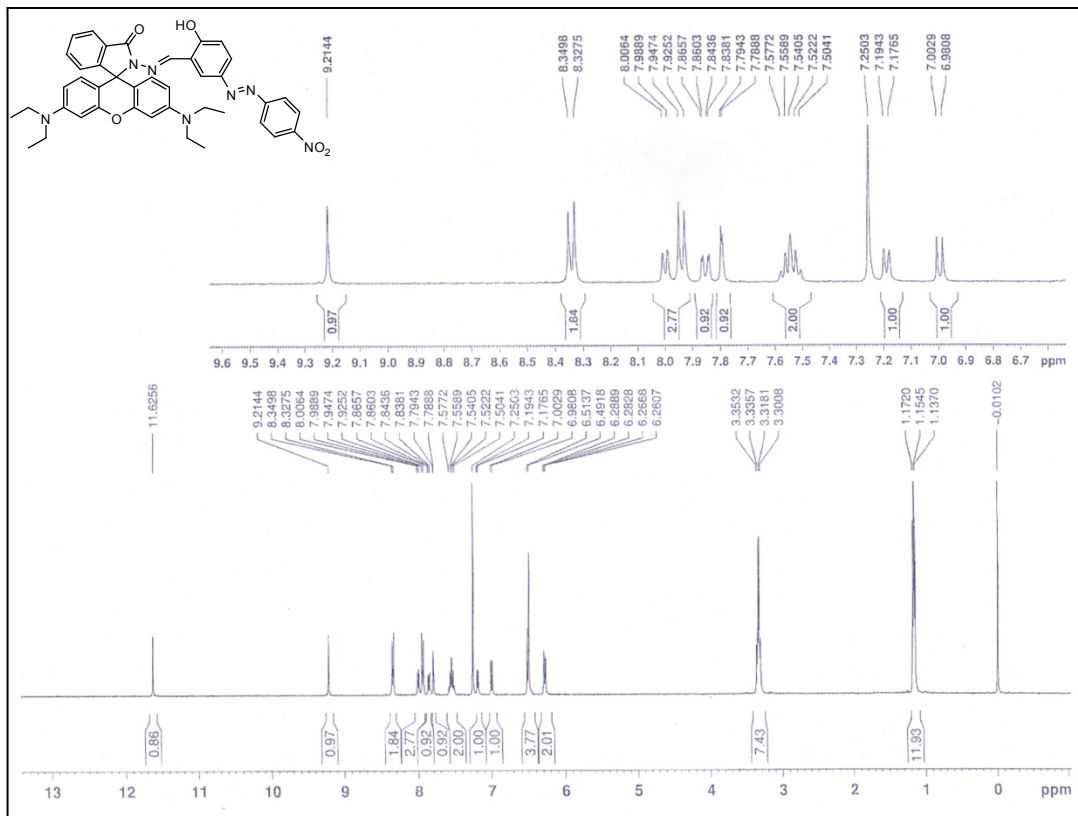

**Figure S1:**  $^1\text{H}$  NMR spectrum of **L** in  $\text{CDCl}_3$  solution.

2.  $^{13}\text{C}$  NMR spectrum of L (400 MHz,  $\text{CDCl}_3$ ):

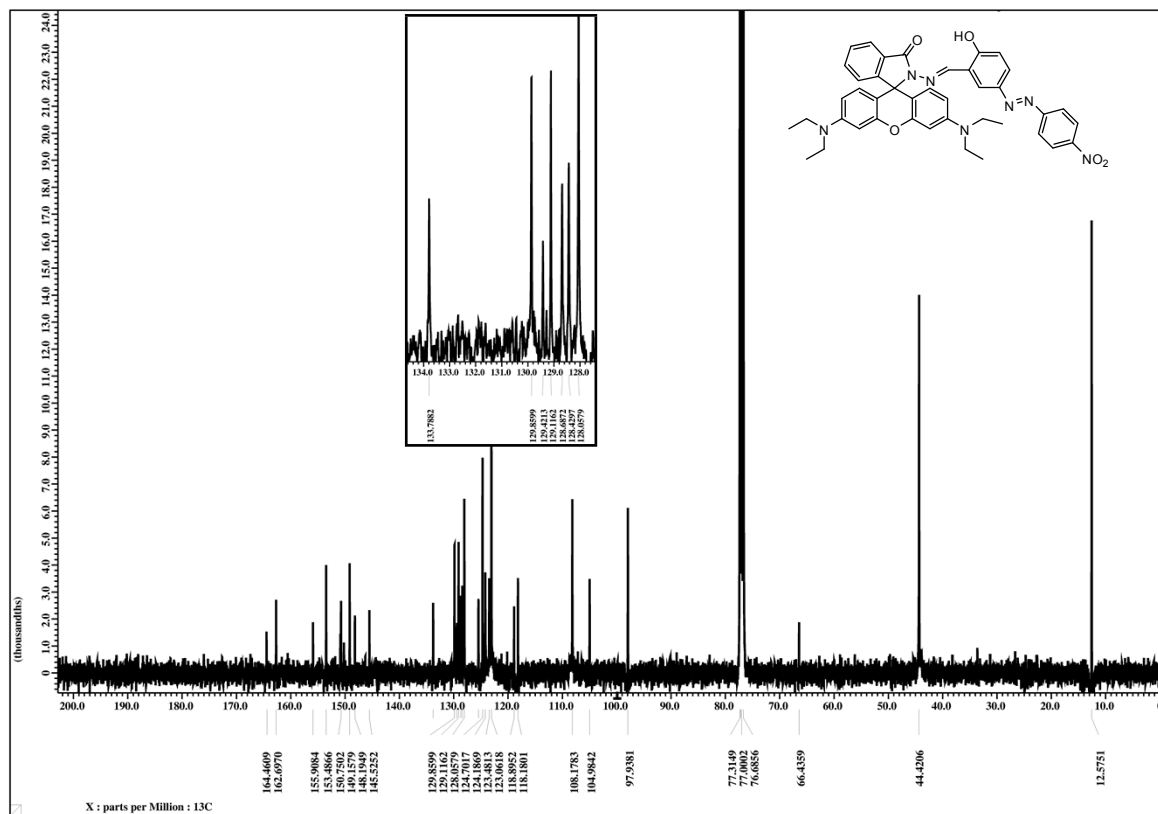

Figure S2:  $^{13}\text{C}$  NMR spectrum of L in  $\text{CDCl}_3$  solution.

### 3. TOF MS ES+ Mass Spectrum of L:

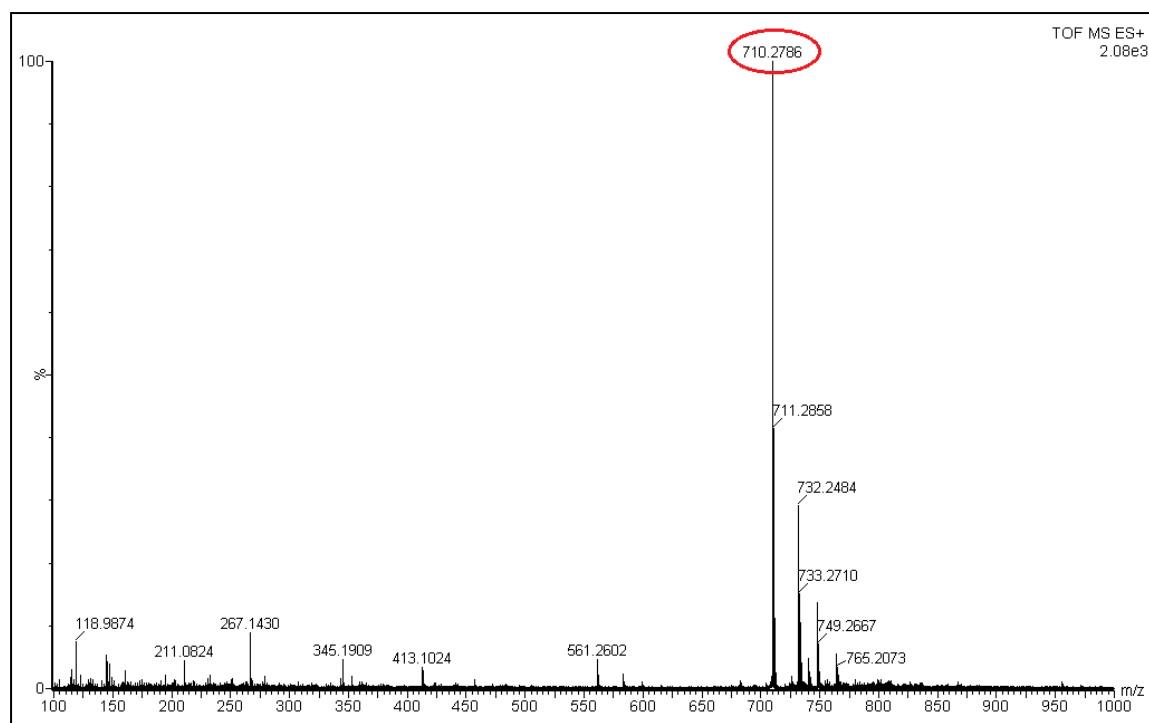

**Figure S3:** Mass spectrum of L.

#### 4. TOF MS ES+ spectrum of L in the presence PdCl<sub>2</sub>:

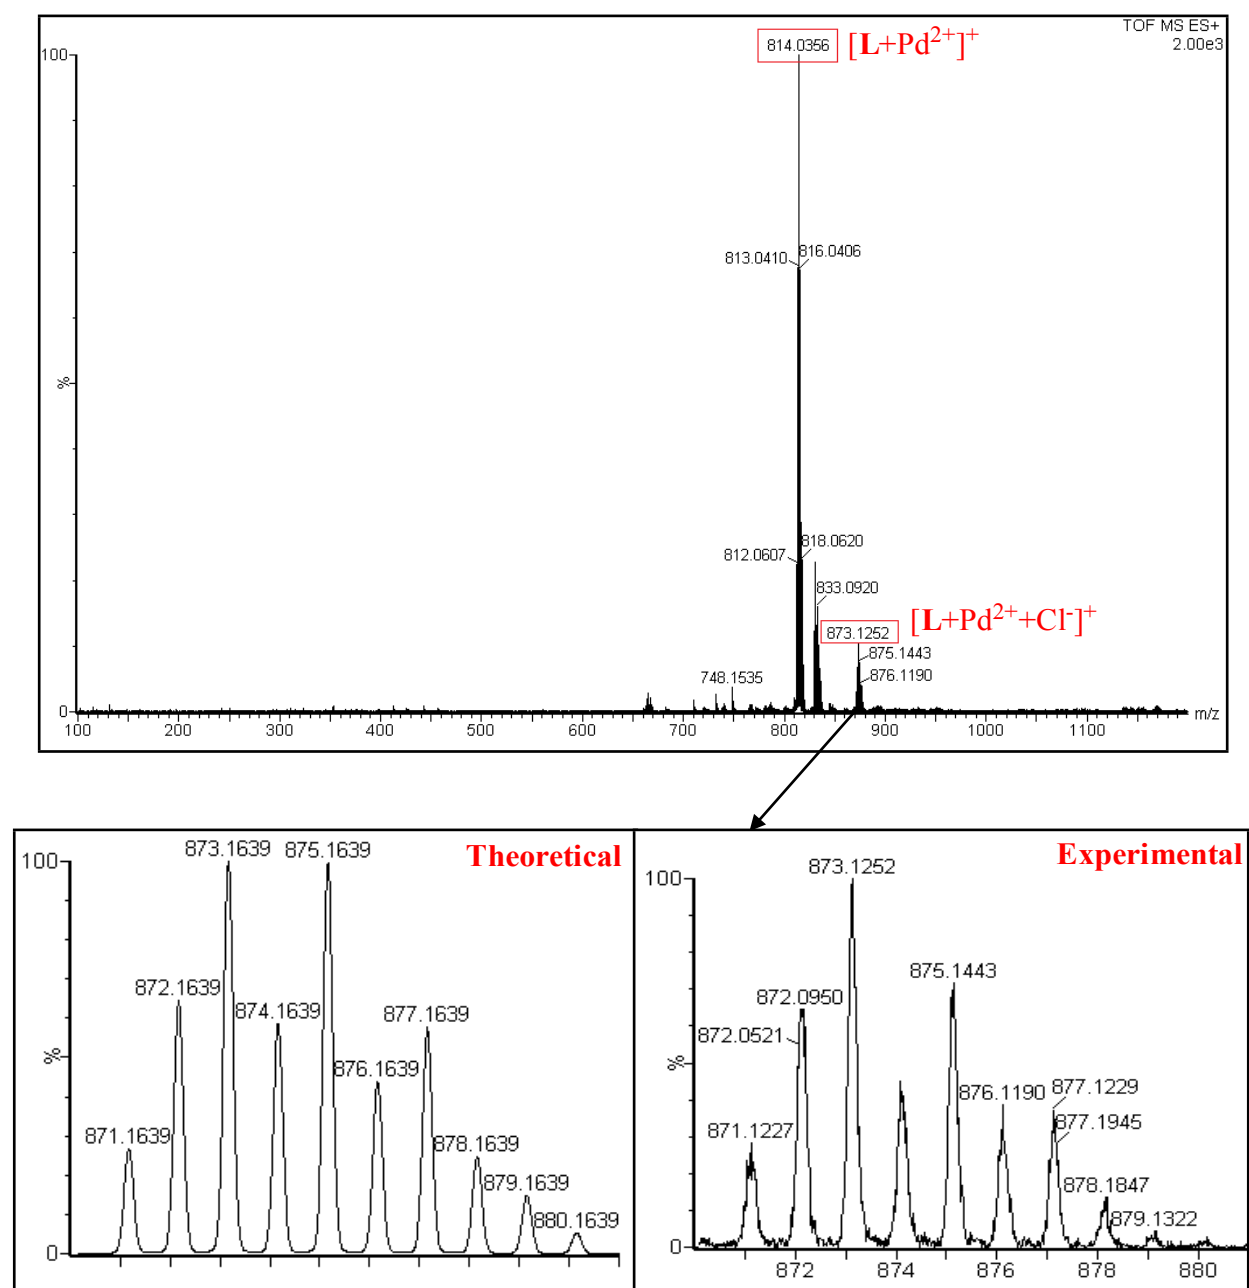

**Figure S4:** ESI Mass spectrum of L-Pd complex and (bottom left) theoretical simulation of L-Pd complex and (right) experimental spectrum of L-Pd complex.

## 5. FTIR spectra for L and L-Pd<sup>2+</sup>:

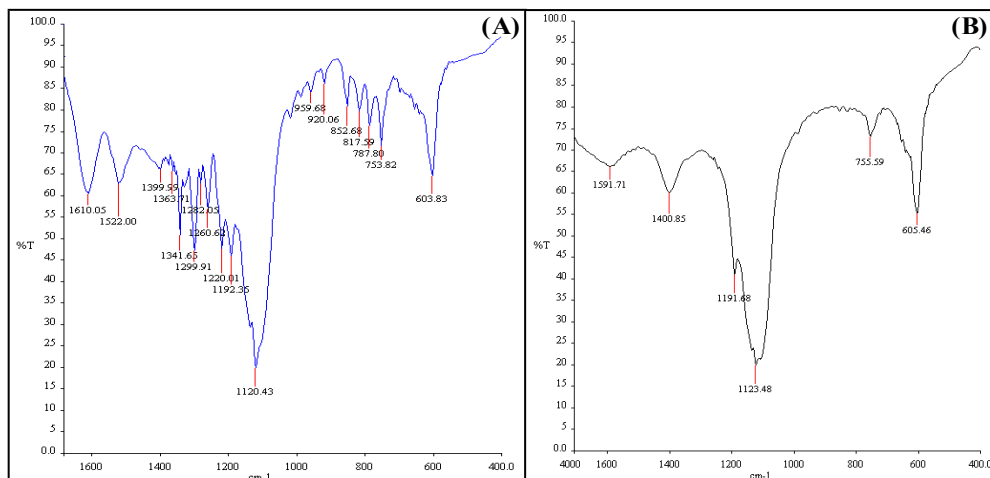

**Figure S5.** FTIR spectra of both (A) L and (B) L-Pd<sup>2+</sup>.

## 6. Job's plot for L-Pd<sup>2+</sup>:

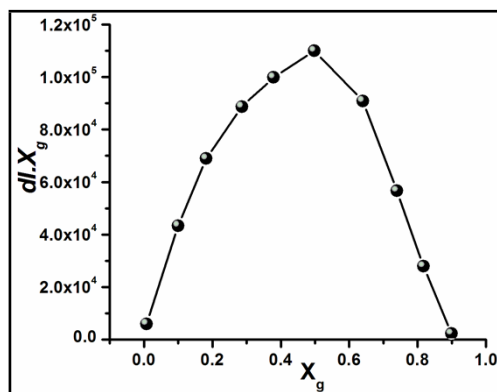

**Figure S6.** Fluorescence Job's plot for L with Pd<sup>2+</sup> in EtOH–water (1: 1, v/v; 10 mM, HEPES buffer, pH = 7.4, ([H] = [G] = 4 × 10<sup>-5</sup> M).

## 7. Calculations for detection limit:

The detection limit (LOD) of **L** for  $\text{Pd}^{2+}$  were determined from the following equation<sup>1</sup>:

$\text{DL} = 3\text{Sb1}/\text{S}$  , Where Sb1 is the standard deviation of the blank solution; S is the slope of the calibration curve.

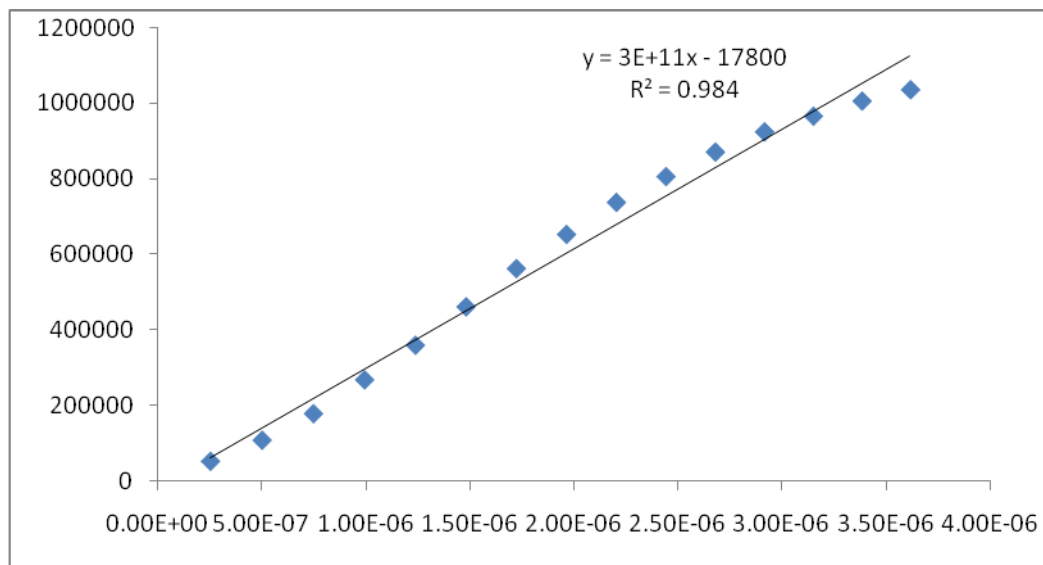

**Figure S7:** Calibration curve for fluorescence titration of **L** with  $\text{Pd}^{2+}$ .

From the graph we get slope =  $3 \times 10^{11}$ , and Sb1 value is 45043.81.

Thus using the formula we get the Detection Limit =  $0.45 \mu\text{M} = 4.5 \times 10^{-7} \text{ M}$ .

## 8. UV-vis Bar Diagram of L in presence of various metal ions:

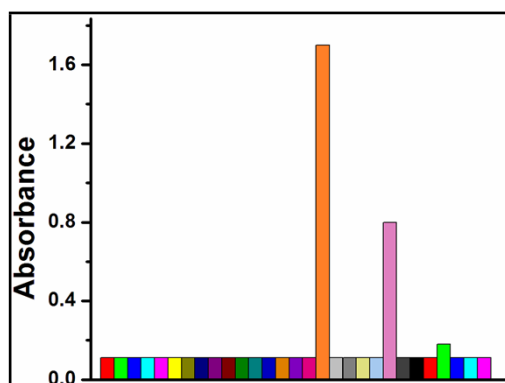

**Figure S8.** Change in the absorption spectrum of receptor **L** [ $c = 4 \times 10^{-5}$  M, EtOH / H<sub>2</sub>O = 1 : 1, v/v, 10 mM HEPES buffer, pH = 7.4) with respective metal cations ( $c = 1 \times 10^{-4}$  M, left to right: **L**, Li<sup>+</sup>, Na<sup>+</sup>, K<sup>+</sup>, Ca<sup>2+</sup>, Mg<sup>2+</sup>, Sr<sup>2+</sup>, Ba<sup>2+</sup>, Zr<sup>4+</sup>, Hf<sup>4+</sup>, Cr<sup>3+</sup>, Mn<sup>2+</sup>, Fe<sup>2+</sup>, Fe<sup>3+</sup>, Co<sup>2+</sup>, Ni<sup>2+</sup>, Cu<sup>2+</sup>, Zn<sup>2+</sup>, Cd<sup>2+</sup>, Hg<sup>2+</sup>, Ru<sup>3+</sup>, Pd<sup>2+</sup>, Pt<sup>2+</sup>, Ag<sup>+</sup>, Au<sup>3+</sup>, Sn<sup>4+</sup>, Pb<sup>2+</sup>, Pd<sup>0</sup> and Al<sup>3+</sup>).

## 9. Competitive experiments of L:

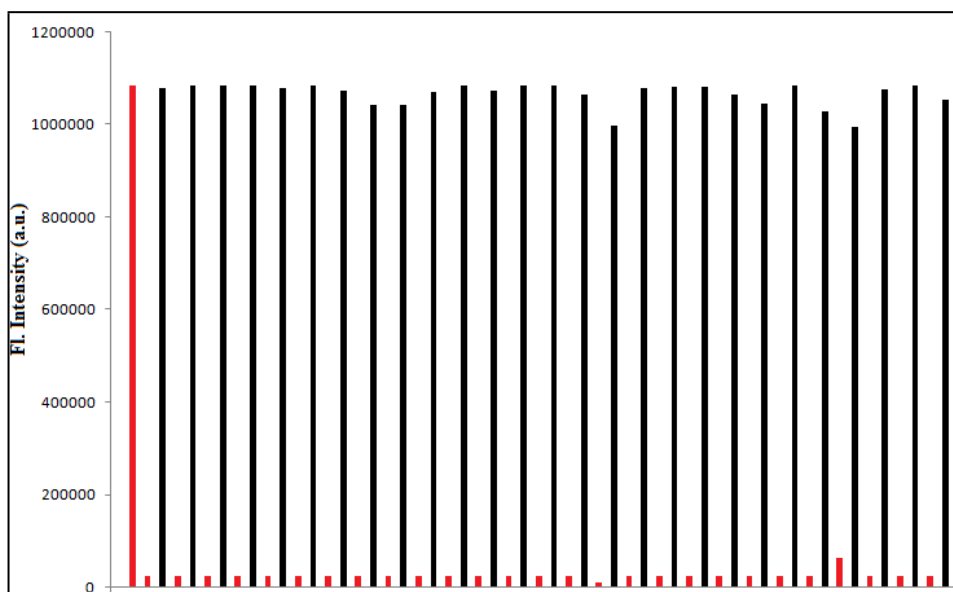

**Figure S9.** Fluorescence response of **L** ( $c = 4 \times 10^{-5}$  M) to 1 eqv. addition of Pd<sup>2+</sup> ( $c = 1 \times 10^{-4}$  M) and 10 eqv. of other metal ions ( $c = 1 \times 10^{-4}$  M) [the red bar portion] and to the mixture of 10 eqv. of other metal ions with 1 eqv. addition of Pd<sup>2+</sup> [the black bar portion]. [Metal ions from left to right: Pd<sup>2+</sup>, Li<sup>+</sup>, Na<sup>+</sup>, K<sup>+</sup>, Ca<sup>2+</sup>, Mg<sup>2+</sup>, Sr<sup>2+</sup>, Ba<sup>2+</sup>, Zr<sup>4+</sup>, Hf<sup>4+</sup>, Cr<sup>3+</sup>, Mn<sup>2+</sup>, Fe<sup>2+</sup>, Fe<sup>3+</sup>, Co<sup>2+</sup>, Ni<sup>2+</sup>, Cu<sup>2+</sup>, Zn<sup>2+</sup>, Cd<sup>2+</sup>, Hg<sup>2+</sup>, Ru<sup>3+</sup>, Pt<sup>2+</sup>, Ag<sup>+</sup>, Au<sup>3+</sup>, Sn<sup>4+</sup>, Pb<sup>2+</sup>, Pd<sup>0</sup>, and Al<sup>3+</sup>].



## 10. Visual and fluorescence photographic image of **L** in presence of different metal ions

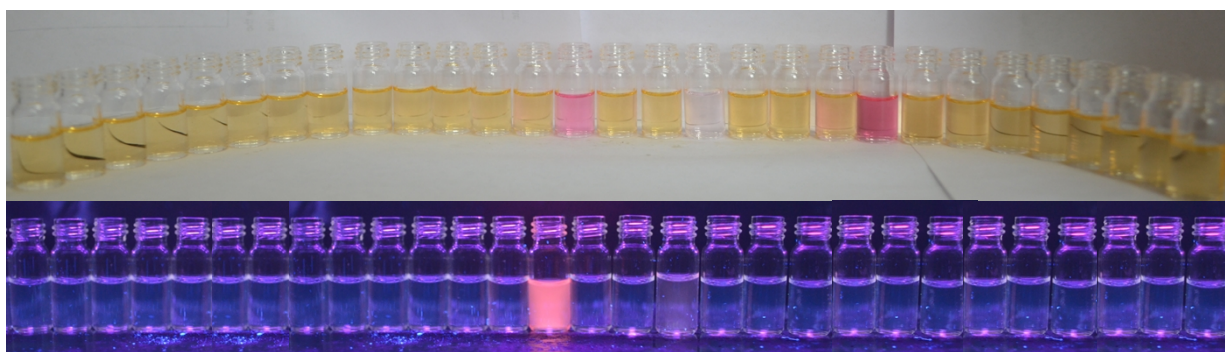

**Figure S10.** The Visible color (top) and fluorescence changes (bottom) of receptor **L** in EtOH–H<sub>2</sub>O solution upon addition of various metal ions. [From left to right: **L** , Li<sup>+</sup>, Na<sup>+</sup>, K<sup>+</sup>, Ca<sup>2+</sup> , Mg<sup>2+</sup>, Sr<sup>2+</sup>, Ba<sup>2+</sup>, Zr<sup>4+</sup>, Hf<sup>4+</sup>, Cr<sup>3+</sup>, Mn<sup>2+</sup>, Fe<sup>2+</sup>, Pd<sup>2+</sup>, Fe<sup>3+</sup>, Co<sup>2+</sup>, Sn<sup>4+</sup>, Ni<sup>2+</sup>, Zn<sup>2+</sup>, Cu<sup>2+</sup>, Cd<sup>2+</sup>, Hg<sup>2+</sup>, Ru<sup>3+</sup>, Pt<sup>2+</sup>, Ag<sup>+</sup>, Au<sup>3+</sup>, Pb<sup>2+</sup> , Pd<sup>0</sup> , and Al<sup>3+</sup>].

## 11. Calculations for the Binding Constants Using Spectrophotometric Titration Data:

The association constant and stoichiometry for the formation of the respective complexes were evaluated using the Benesi–Hildebrand (B–H) plot (eq 1).<sup>2</sup>

$$1/(I - I_0) = 1/K(I_{\max} - I_0)[M^{n+}] + 1/(I_{\max} - I_0) \quad (1)$$

where  $I_0$ ,  $I_{\max}$ , and  $I$  represent the emission intensity of free **L**, the maximum emission intensity observed in the presence of added metal ion at 579 nm for Pd<sup>2+</sup> ( $\lambda_{\text{ext}} = 561$  nm), and the emission intensity at a certain concentration of the metal ion added, respectively.

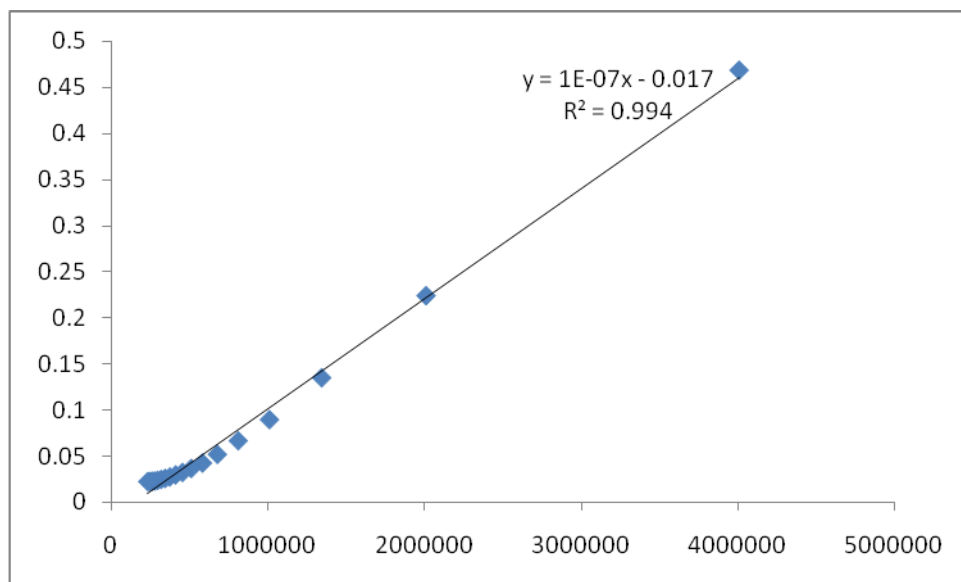

**Figure S11:** Bensei-Hildebrand plot obtained from the Fluorescence titration data of **L** ( $4 \times 10^{-5}$  M) with  $\text{Pd}^{2+}$  ( $1 \times 10^{-4}$  M).

## 12. Reversibility Study:

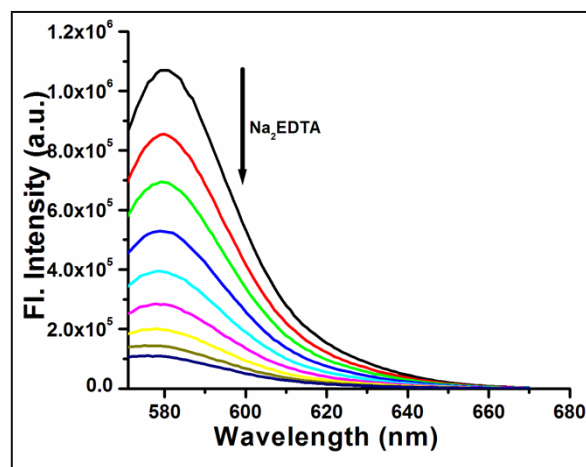

**Figure S12:** Change in emission spectra of **L**-Pd complex in EtOH- $\text{H}_2\text{O}$  solution (EtOH :  $\text{H}_2\text{O}$  = 1: 1, v/v, 10 mM HEPES buffer, pH = 7.4) upon addition of  $\text{Na}_2\text{EDTA}$ .

### 13. UV-vis spectra of **1** in presence of Pd<sup>2+</sup> ions:

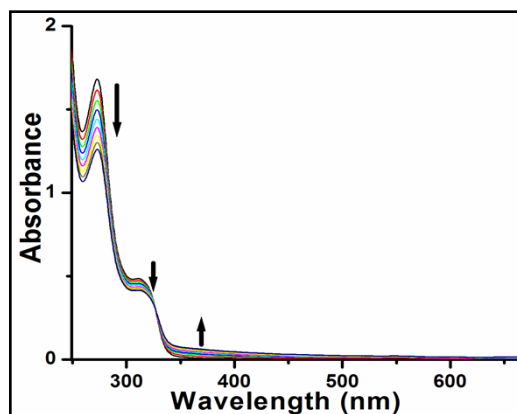

**Figure S13:** UV-Vis spectral changes of **1** ( $c = 4 \times 10^{-5}$  M) in EtOH/H<sub>2</sub>O (1:1, v/v, 10 mM HEPES buffer, pH 7.4) solutions upon addition of Pd<sup>2+</sup> ions.

### 14. DFT study:

The calculation has been carried out at B3LYP with 6-31G(d) basis except for Pd, LANL2DZ with ECP basis set is used.

| Species                  | E(HOMO)  | E(LUMO)  | $\Delta E$ (Hartree) | $\Delta E$ (eV) | $\Delta E$ (kcal/mol) |
|--------------------------|----------|----------|----------------------|-----------------|-----------------------|
| <b>L</b>                 | -0.19782 | -0.09829 | 0.09953              | 2.708370548     | 62.45602054           |
| <b>L-Pd<sup>2+</sup></b> | -0.28057 | -0.22138 | 0.05919              | 1.610654604     | 37.1422873            |

### 15. X-ray Crystallography study:

Single crystal suitable for X-ray analysis was performed on Bruker APEX II Duo CCD area-detector diffractometer using Mo K $\alpha$  radiation ( $\lambda = 0.71073$  Å). Data collection was performed using the *APEX2* software, whereas the cell refinement and data reduction were performed under the *SAINT* software. The crystal structure was solved by direct method and refined against  $F^2$  by full-matrix least-squares refinement using *SHELXTL* package. The non-hydrogen atoms were refined anisotropically, whereby the O-bound and C-bound hydrogen

atoms were located in difference fourier maps (O–H = 0.8999 Å) and positioned geometrically (C–H = 0.93 - 0.97 Å), respectively. One of the methyl groups is disordered over two positions with refined site-occupancies of 0.550(13) and 0.450(13). The same  $U_{ij}$  parameters were used for atom pairs C25/C26 and C28/C29. A rotating-group model was applied for the methyl groups. The final refinement converged well. Absorption correction was applied to the final crystal data by using the *SADABS* software. Crystallographic data for **L** has been deposited with the Cambridge Crystallographic Data Center No. CCDC **1013077**.

**Table S1:** Experimental details

| Crystal data                                                                                                |                                                                         |
|-------------------------------------------------------------------------------------------------------------|-------------------------------------------------------------------------|
| <b>CCDC number</b>                                                                                          | <b>1013077</b>                                                          |
| <b>Emperical formula</b>                                                                                    | <b>C<sub>41</sub>H<sub>39</sub>N<sub>7</sub>O<sub>5</sub></b>           |
| <b><i>M<sub>r</sub></i></b>                                                                                 | <b>709.79</b>                                                           |
| <b>Crystal system, space group</b>                                                                          | <b>Triclinic, <i>P</i>1</b>                                             |
| <b>Temperature (K)</b>                                                                                      | <b>294</b>                                                              |
| <b><i>a</i>, <i>b</i>, <i>c</i> (Å)</b>                                                                     | <b>10.244 (1), 13.8307 (14), 14.5665 (14)</b>                           |
| <b><math>\alpha</math>, <math>\beta</math>, <math>\gamma</math> (°)</b>                                     | <b>72.3415 (18), 70.1280 (18), 75.9246 (18)</b>                         |
| <b><i>V</i> (Å<sup>3</sup>)</b>                                                                             | <b>1826.7 (3)</b>                                                       |
| <b><i>Z</i></b>                                                                                             | <b>2</b>                                                                |
| <b>Radiation type</b>                                                                                       | <b>Mo <i>K</i><math>\alpha</math></b>                                   |
| <b><math>\mu</math> (mm<sup>-1</sup>)</b>                                                                   | <b>0.09</b>                                                             |
| <b>Crystal size (mm)</b>                                                                                    | <b>0.62 × 0.27 × 0.11</b>                                               |
| Data collection                                                                                             |                                                                         |
| <b>Diffractometer</b>                                                                                       | <b>Bruker <i>SMART APEX</i> II DUO CCD area-detector diffractometer</b> |
| <b>Absorption correction</b>                                                                                | <b>Multi-scan<br/>(<i>SADABS</i>; Bruker, 2009)</b>                     |
| <b><i>T<sub>min</sub></i>, <i>T<sub>max</sub></i></b>                                                       | <b>0.948, 0.991</b>                                                     |
| <b>No. of measured, independent and observed [<i>I</i> &gt; 2<math>\sigma</math>(<i>I</i>)] reflections</b> | <b>21242, 6834, 4216</b>                                                |
| <b><i>R<sub>int</sub></i></b>                                                                               | <b>0.026</b>                                                            |

|                                                                |                               |
|----------------------------------------------------------------|-------------------------------|
| $(\sin \theta/\lambda)_{\max}$ ( $\text{\AA}^{-1}$ )           | 0.609                         |
| Refinement                                                     |                               |
| $R[F^2 > 2\sigma(F^2)], wR(F^2), S$                            | 0.087, 0.291, 1.09            |
| No. of reflections                                             | 6834                          |
| No. of parameters                                              | 481                           |
| H-atom treatment                                               | H-atom parameters constrained |
| $\Delta\rho_{\max}, \Delta\rho_{\min}$ ( $\text{e \AA}^{-3}$ ) | 0.79, -0.58                   |

**Table S2:** Hydrogen-bond geometry ( $\text{\AA}$ ,  $^\circ$ )

| $D-H\cdots A$                                        | $D-H$ | $H\cdots A$ | $D\cdots A$ | $D-H\cdots A$ |
|------------------------------------------------------|-------|-------------|-------------|---------------|
| <b>O3—H1O3<math>\cdots</math>N2</b>                  | 0.90  | 1.80        | 2.633 (5)   | 153           |
| <b>C11—H11A<math>\cdots</math>O2<sup>i</sup></b>     | 0.93  | 2.53        | 3.434 (5)   | 163           |
| <b>C21—H21A <math>\cdots</math> Cg1<sup>ii</sup></b> | 0.93  | 2.28        | 3.024(5)    | 137           |

Symmetry codes: (i)  $-x+2, -y+2, -z$  (ii)  $x, y, z$ .

\* Cg1 is the centroid of O1/C6/C7/C12/C13 ring.

## References:

- (a) L. Long, D. Zhang, X. Li, J. Zhang, C. Zhang and L. Zhou, *Anal. Chim. Acta*, 2013, **775**, 100–105; (b) M. Zhu, M. Yuan, X. Liu, J. Xu, J. Lv, C. Huang, H. Liu, Y. Li, S. Wang and D. Zhu, *Org. Lett.*, 2008, **10**, 1481-1484. (c) C. Kar, M. D. Adhikari, A. Ramesh and G. Das, *Inorg. Chem.*, 2013, **52**, 743–752.
- (a) H. A. Benesi and J. H. Hildebrand, *J. Am. Chem. Soc.*, 1949, **71**, 2703–2707; (b) C. Yang, L. Liu, T. -W. Mu and Q. -X. Guo, *Anal. Sci.*, 2000, **16**, 537–539; (c) Y. Shiraishi, S. Sumiya, Y. Kohno and T. Hirai, *J. Org. Chem.*, 2008, **73**, 8571–8574.
